# Supplementary material
Source: ML conference proceedings conference paper supplement (https://openaccess.thecvf.com/content/cvpr_2016/html/Mollenhoff_Sublabel-Accurate_Relaxation_of_2016_CVPR_paper.html)
Supplement: Supplementary file 1 [file Mollenhoff_Sublabel-Accurate_Relaxation_of_2016_CVPR_supplemental.pdf]

# Sublabel–Accurate Relaxation of Nonconvex Energies

## Supplementary Material

Thomas Möllenhoff\*  
TU München  
moellenh@in.tum.de

Emanuel Laude\*  
TU München  
laudee@in.tum.de

Michael Moeller  
TU München  
moellerm@in.tum.de

Jan Lellmann  
University of Lübeck  
lellmann@mic.uni-luebeck.de

Daniel Cremers  
TU München  
cremers@tum.de

*Proof of Proposition 1.* The proof follows from a direct calculation. We start with the definition of the biconjugate:

$$\begin{aligned}\rho^{**}(\mathbf{u}) &= \sup_{\mathbf{v} \in \mathbb{R}^k} \langle \mathbf{u}, \mathbf{v} \rangle - \left( \min_{1 \leq i \leq k} \rho_i(\mathbf{u}) \right)^* \\ &= \sup_{\mathbf{v} \in \mathbb{R}^k} \langle \mathbf{u}, \mathbf{v} \rangle - \max_{1 \leq i \leq k} \rho_i^*(\mathbf{u}).\end{aligned}\quad (1)$$

This shows the first equation inside the proposition. For the individual  $\rho_i^*$  we again start with the definition of the convex conjugate:

$$\begin{aligned}\rho_i^*(\mathbf{v}) &= \sup_{\alpha \in [0,1]} \langle \alpha \mathbf{1}_i + (1-\alpha) \mathbf{1}_{i-1}, \mathbf{v} \rangle - \\ &\quad \rho(\alpha \gamma_{i+1} + (1-\alpha) \gamma_i) \\ &= \sup_{\alpha \in [0,1]} \langle \mathbf{1}_{i-1}, \mathbf{v} \rangle + \alpha \mathbf{v}_i - \rho(\gamma_i^\alpha).\end{aligned}\quad (2)$$

Applying the substitution  $\gamma_i^\alpha = \alpha \gamma_{i+1} + (1-\alpha) \gamma_i$  and consequently  $\alpha = \frac{\gamma_i^\alpha - \gamma_i}{\gamma_{i+1} - \gamma_i}$  yields:

$$\begin{aligned}\rho_i^*(\mathbf{v}) &= \sup_{\gamma_i^\alpha \in \Gamma_i} \langle \mathbf{1}_{i-1}, \mathbf{v} \rangle + \frac{\gamma_i^\alpha - \gamma_i}{\gamma_{i+1} - \gamma_i} \mathbf{v}_i - \rho(\gamma_i^\alpha) \\ &= \langle \mathbf{1}_{i-1}, \mathbf{v} \rangle - \frac{\gamma_i}{\gamma_{i+1} - \gamma_i} \mathbf{v}_i + \sup_{\gamma_i^\alpha \in \Gamma_i} \frac{\gamma_i^\alpha}{\gamma_{i+1} - \gamma_i} \mathbf{v}_i - \rho(\gamma_i^\alpha) \\ &= \langle \mathbf{1}_{i-1}, \mathbf{v} \rangle - \frac{\gamma_i}{\gamma_{i+1} - \gamma_i} \mathbf{v}_i + (\rho + \delta_{\Gamma_i})^* \left( \frac{\mathbf{v}_i}{\gamma_{i+1} - \gamma_i} \right) \\ &= : c_i(\mathbf{v}) + \rho_i^* \left( \frac{\mathbf{v}_i}{\gamma_{i+1} - \gamma_i} \right).\end{aligned}\quad (3)$$

□

\*Those authors contributed equally.

*Proof of Proposition 2.* It is easy to see that

$$\sigma^*(\mathbf{v}) = \max_{i \in \{1, \dots, L\}} \left( \sum_{l=1}^{i-1} \mathbf{v}_l - \rho(\gamma_i) \right).$$

To compute the biconjugate, we write any input argument  $\mathbf{u} = \sum_{i=1}^k \mu_i \mathbf{1}_{i+1}$ , and use  $\sigma^{**} = \rho^{**}$  to obtain

$$\begin{aligned}\rho^{**}(\mathbf{u}) &= \sup_{\mathbf{v}} \langle \mathbf{u}, \mathbf{v} \rangle - \max_{i \in \{1, \dots, L\}} \left( \sum_{l=1}^{i-1} \mathbf{v}_l - \rho(\gamma_i) \right) \\ &= \sup_{\mathbf{v}} \sum_{i=1}^k \mu_i \sum_{l=1}^i \mathbf{v}_l - \max_{i \in \{1, \dots, L\}} \left( \sum_{l=1}^{i-1} \mathbf{v}_l - \rho(\gamma_i) \right).\end{aligned}$$

Instead of taking the supremum of all  $\mathbf{v}$ , we might as well take the supremum over all vectors  $\mathbf{p}$  with  $\mathbf{p}_i = \sum_{l=1}^i \mathbf{v}_l$ . Care has to be taken of the first summand in the second term of the above formulation. We obtain

$$\begin{aligned}& \sup_{\mathbf{v}} \sum_{i=1}^k \mu_i \sum_{l=1}^i \mathbf{v}_l - \max_{i \in \{1, \dots, L\}} \left( \sum_{l=1}^{i-1} \mathbf{v}_l - \rho(\gamma_i) \right), \\ &= \sup_{\mathbf{p}} \sum_{i=1}^k \mu_i \mathbf{p}_i - \max_{i \in \{2, \dots, L\}} \max(\mathbf{p}_{i-1} - \rho(\gamma_i), -\rho(\gamma_1)), \\ &= \sup_{\mathbf{p}} \sum_{i=1}^k \mu_i \mathbf{p}_i - \max_{i \in \{1, \dots, k\}} \max(\mathbf{p}_i - \rho(\gamma_{i+1}), -\rho(\gamma_1)), \\ &= \sum_{i=1}^k \mu_i \rho(\gamma_{i+1}) \\ &\quad + \sup_{\mathbf{p}} \sum_{i=1}^k \mu_i \mathbf{p}_i - \max_{i \in \{1, \dots, k\}} \max(\mathbf{p}_i, -\rho(\gamma_1)),\end{aligned}$$

Note that for any  $\mu_i$  being negative, the supremum immediately yields infinity by taking  $\mathbf{p}_i \rightarrow -\infty$ . Similarly, if  $\sum_{i=1}^k \mu_i > 1$  yields infinity by taking all  $\mathbf{p}_i \rightarrow \infty$ . For  $\mu_i \geq 0$  for all  $i$ , and  $\sum_{i=1}^k \mu_i \leq 1$ , we know that  $\sum_{i=1}^k \mu_i \mathbf{p}_i \leq (\max_i \mathbf{p}_i) \sum_{i=1}^k \mu_i$ . Since equality can be obtained by choosing  $\mathbf{p}_l = \max_i \mathbf{p}_i$  for all  $l$ , we can reduce the above supremum to

$$\sup_z \left( z \sum_{i=1}^k \mu_i - \max(z, -\rho(\gamma_1)) \right) = \left( 1 - \sum_{i=1}^k \mu_i \right) \rho(\gamma_1),$$

where we used that the supremum over  $z$  is attained at  $z = -\rho(\gamma_1)$  (still assuming that  $\sum_{i=1}^k \mu_i \leq 1$ ). Let us now undo our change of variable. It is easy to see that  $\mu_k = \mathbf{u}_k$ , and  $\mu_i = \mathbf{u}_i - \mathbf{u}_{i+1}$  for  $i = 1, \dots, k-1$ . The latter leads to

$$\begin{aligned} & \sum_{i=1}^k \mu_i \rho(\gamma_{i+1}) + \left( 1 - \sum_{i=1}^k \mu_i \right) \rho(\gamma_1) \\ &= \rho(\gamma_{k+1}) \mathbf{u}_k + \sum_{i=1}^{k-1} (\mathbf{u}_i - \mathbf{u}_{i+1}) \rho(\gamma_{i+1}) + (1 - \mathbf{u}_1) \rho(\gamma_1) \\ &= \rho(\gamma_1) + \langle \mathbf{u}, \mathbf{r} \rangle, \end{aligned}$$

for  $\mathbf{r}_i = \rho(\gamma_{i+1}) - \rho(\gamma_i)$ . Considering the aforementioned constraints of  $\mu_i \geq 0$ , and  $\sum_{i=1}^k \mu_i \leq 1$ , we finally find

$$\rho^{**}(\mathbf{u}) = \begin{cases} \rho(\gamma_1) + \langle \mathbf{u}, \mathbf{r} \rangle & \text{if } 1 \geq \mathbf{u}_1 \geq \dots \geq \mathbf{u}_k \geq 0, \\ \infty, & \text{else.} \end{cases}$$

□

*Proof of Proposition 3.* For the special case  $k = 1$  the biconjugate from (1) is just:

$$\rho^{**}(\mathbf{u}) = \sup_{\mathbf{v} \in \mathbb{R}} \mathbf{u}\mathbf{v} - \rho_1^*(\mathbf{v}) = \rho_1^{**}(\mathbf{u}). \quad (4)$$

Now using the first line in (3),  $\rho_1^{**}$  becomes:

$$\begin{aligned} \rho_1^{**}(\mathbf{u}) &= \sup_{\mathbf{v} \in \mathbb{R}} \mathbf{u}\mathbf{v} - \sup_{\gamma \in \Gamma} \frac{\gamma - \gamma_1}{\gamma_2 - \gamma_1} \mathbf{v} - \rho(\gamma) \\ &= \sup_{\mathbf{v} \in \mathbb{R}} \mathbf{v} \left( \mathbf{u} + \frac{\gamma_1}{\gamma_2 - \gamma_1} \right) - \sup_{\gamma \in \Gamma} \gamma \frac{\mathbf{v}}{\gamma_2 - \gamma_1} - \rho(\gamma) \\ &= \sup_{\mathbf{v} \in \mathbb{R}} \mathbf{v} \left( \mathbf{u} + \frac{\gamma_1}{\gamma_2 - \gamma_1} \right) - \rho^* \left( \frac{\mathbf{v}}{\gamma_2 - \gamma_1} \right) \\ &= \sup_{\tilde{\mathbf{v}} \in \mathbb{R}} \tilde{\mathbf{v}} (\gamma_1 + \mathbf{u}(\gamma_2 - \gamma_1)) - \rho^*(\tilde{\mathbf{v}}) \\ &= \rho^{**}(\gamma_1 + \mathbf{u}(\gamma_2 - \gamma_1)), \end{aligned} \quad (5)$$

where we used  $\text{dom}(\rho) = \Gamma$  as well as the substitution  $\mathbf{v} = (\gamma_2 - \gamma_1)\tilde{\mathbf{v}}$ . □

*Proof of Proposition 4.* We compute the individual conjugate as:

$$\begin{aligned} \Phi_{i,j}^*(\mathbf{q}) &= \sup_{\mathbf{g} \in \mathbb{R}^{d \times k}} \langle \mathbf{g}, \mathbf{q} \rangle - \Phi_{i,j}(\mathbf{q}) \\ &= \sup_{\alpha, \beta \in [0,1]} \sup_{\nu \in \mathbb{R}^d} \langle \mathbf{q}, (\mathbf{1}_i^\alpha - \mathbf{1}_j^\beta) \nu^\top \rangle - |\gamma_i^\alpha - \gamma_j^\beta| |\nu|_2 \\ &= \sup_{\alpha, \beta \in [0,1]} \sup_{\nu \in \mathbb{R}^d} \langle \mathbf{q}^\top (\mathbf{1}_i^\alpha - \mathbf{1}_j^\beta), \nu \rangle - |\gamma_i^\alpha - \gamma_j^\beta| |\nu|_2 \\ &= \sup_{\alpha, \beta \in [0,1]} \sup_{\nu \in \mathbb{R}^d} \langle \mathbf{q}^\top (\mathbf{1}_i^\alpha - \mathbf{1}_j^\beta), \nu \rangle - |\gamma_i^\alpha - \gamma_j^\beta| |\nu|_2. \end{aligned} \quad (6)$$

The inner maximum over  $\nu$  is the conjugate of the  $\ell_2$ -norm scaled by  $|\gamma_i^\alpha - \gamma_j^\beta|$  evaluated at  $\mathbf{q}^\top (\mathbf{1}_i^\alpha - \mathbf{1}_j^\beta)$ . This yields:

$$\Phi_{i,j}^*(\mathbf{q}) = \begin{cases} 0, & \text{if } \left| \mathbf{q}^\top (\mathbf{1}_i^\alpha - \mathbf{1}_j^\beta) \right|_2 \leq |\gamma_i^\alpha - \gamma_j^\beta|, \\ \infty, & \text{else.} \end{cases} \quad \forall \alpha, \beta \in [0,1], \quad (7)$$

For the overall biconjugate we have:

$$\begin{aligned} \Phi^{**}(\mathbf{g}) &= \sup_{\mathbf{q} \in \mathbb{R}^{k \times d}} \langle \mathbf{q}, \mathbf{g} \rangle - \max_{1 \leq i, j \leq k} \Phi_{i,j}^*(\mathbf{q}) \\ &= \sup_{\mathbf{q} \in \mathcal{K}} \langle \mathbf{q}, \mathbf{g} \rangle. \end{aligned} \quad (8)$$

Since we have the max over all  $1 \leq i, j \leq k$  conjugates, the set  $\mathcal{K}$  is given as the intersection of the sets described by the individual indicator functions  $\Phi_{i,j}$ :

$$\begin{aligned} \mathcal{K} &= \left\{ \mathbf{q} \in \mathbb{R}^{k \times d} \mid \right. \\ & \quad \left. \left| \mathbf{q}^\top (\mathbf{1}_i^\alpha - \mathbf{1}_j^\beta) \right|_2 \leq |\gamma_i^\alpha - \gamma_j^\beta|, \right. \\ & \quad \left. \forall 1 \leq i \leq j \leq k, \forall \alpha, \beta \in [0,1] \right\}. \end{aligned} \quad (9)$$

□

*Proof of Proposition 5.* First we rewrite (9) by expanding the matrix-vector product into sums:

$$\begin{aligned} & \left| \sum_{l=j}^{i-1} \mathbf{q}_l + \alpha \mathbf{q}_i - \beta \mathbf{q}_j \right|_2 \leq |\gamma_i^\alpha - \gamma_j^\beta|, \\ & \forall 1 \leq j \leq i \leq k, \forall \alpha, \beta \in [0,1]. \end{aligned} \quad (10)$$

Since the other cases for  $1 \leq i \leq j \leq k$  in (9) are equivalent to (10), it is enough to consider (10) instead of (9).

Let  $\gamma_1 < \gamma_2 < \dots < \gamma_L$ . In the following, we will show the equivalences:

(10)

 $\Leftrightarrow$ 

$$\left| \sum_{l=j}^i \mathbf{q}_l \right|_2 \leq \gamma_{i+1} - \gamma_j, \forall 1 \leq j \leq i \leq k. \quad (11)$$

 $\Leftrightarrow$ 

$$|\mathbf{q}_i|_2 \leq \gamma_{i+1} - \gamma_i, \forall 1 \leq i \leq k. \quad (12)$$

The direction “(10)  $\Rightarrow$  (11)” follows by setting  $\alpha = 1$  and  $\beta = 0$  in (10), and “(11)  $\Rightarrow$  (12)” follows by setting  $i = j$  in (11).

The direction “(12)  $\Rightarrow$  (11)” can be proven by a quick calculation:

$$\left| \sum_{l=j}^i \mathbf{q}_l \right|_2 \leq \sum_{l=j}^i |\mathbf{q}_l|_2 \leq \sum_{l=j}^i \gamma_{l+1} - \gamma_l = \gamma_{i+1} - \gamma_j. \quad (13)$$

It remains to show “(11)  $\Rightarrow$  (10)”. We start with the case  $j = i$ :

$$\begin{aligned} |\alpha \mathbf{q}_i - \beta \mathbf{q}_i|_2 &= |\alpha - \beta| |\mathbf{q}_i|_2 \\ &\leq |\alpha - \beta| (\gamma_{i+1} - \gamma_i) \\ &= |(\gamma_{i+1} - \gamma_i)\alpha - (\gamma_{i+1} - \gamma_i)\beta| \\ &= |(\alpha - \beta)(\gamma_{i+1} - \gamma_i)| = |\gamma_i^\alpha - \gamma_i^\beta|. \end{aligned} \quad (14)$$

Now let  $j < i$ . Since  $\gamma_j < \gamma_i$  it also holds that  $\gamma_j^\beta \leq \gamma_i^\alpha$ , thus it is equivalent to show (10) without the absolute value on the right hand side.

First we show that “(11)  $\Rightarrow$  (10)” for  $\beta \in \{0, 1\}$  and  $\alpha \in [0, 1]$ :

$$\begin{aligned} &\left| \sum_{l=j+1}^{i-1} \mathbf{q}_l + \alpha \mathbf{q}_i + (1 - \beta) \mathbf{q}_j \right|_2 \\ &\leq \left| \sum_{l=j+1}^{i-1} \mathbf{q}_l + (1 - \beta) \mathbf{q}_j \right|_2 + \alpha |\mathbf{q}_i|_2 \\ &\stackrel{\text{for } \beta=0 \text{ or } \beta=1}{\leq} \gamma_i - \gamma_j^\beta + \alpha(\gamma_{i+1} - \gamma_i) \\ &= \gamma_i^\alpha - \gamma_j^\beta. \end{aligned} \quad (15)$$

Using a similar argument we show that, using the above,

“(11)  $\Rightarrow$  (10)” for all  $\alpha, \beta \in [0, 1]$ .

$$\begin{aligned} &\left| \sum_{l=j+1}^{i-1} \mathbf{q}_l + \alpha \mathbf{q}_i + (1 - \beta) \mathbf{q}_j \right|_2 \\ &\leq \left| \sum_{l=j+1}^{i-1} \mathbf{q}_l + \alpha \mathbf{q}_i \right|_2 + (1 - \beta) |\mathbf{q}_j|_2 \\ &\stackrel{\text{using (15), } \beta=1}{\leq} \gamma_i^\alpha - \gamma_{j+1} + (1 - \beta)(\gamma_{j+1} - \gamma_j) \\ &= \gamma_i^\alpha - \gamma_j^\beta. \end{aligned} \quad (16)$$

□
